# Supplementary material
Source: PubMed Central journal article supplement (PMC3234724)
Supplement: supp_M111.297952_jbc.M111.297952-2.pdf [file supp_M111.297952_jbc.M111.297952-2.pdf]

**Supplemental Table S1: AES induces proliferation of primary human CD34+ cells in the presence of NUP98-HOXA9**

| Week 4               | Control | AES    | NUP98-HOXA9 | NUP98-HOXA9 + AES |
|----------------------|---------|--------|-------------|-------------------|
| Primitive            | 0       | 0      | 22 ± 2      | 14 ± 4            |
| Intermediate Myeloid | 20 ± 9  | 13 ± 8 | 51 ± 3      | 52 ± 14           |
| Mature Myeloid       | 80 ± 9  | 87 ± 8 | 27 ± 2      | 34 ± 14           |
| Week 5               |         |        |             |                   |
| Primitive            | 0       | 0      | 12 ± 3      | 14 ± 3            |
| Intermediate Myeloid | 4 ± 1   | 4 ± 3  | 43 ± 7      | 50 ± 4            |
| Mature Myeloid       | 96 ± 1  | 96 ± 3 | 46 ± 10     | 37 ± 6            |
| Week 6               |         |        |             |                   |
| Primitive            | 0       | -      | 3 ± 1 **    | 25 ± 3 **         |
| Intermediate Myeloid | 2 ± 1   | -      | 26 ± 8      | 54 ± 4            |
| Mature Myeloid       | 98 ± 1  | -      | 72 ± 9 *    | 21 ± 4 *          |

\*  $P < 0.05$

\*\*  $P < 0.01$

Sorted primary human CD34+ cells from the liquid cultures were harvested at week 4, 5 and 6. Cytospin smears were prepared and stained with Giemsa. A 500 cell differential count was performed. Cells with blast and promyelocyte morphology were counted as primitive; those with myelocyte/metamyelocyte morphology as intermediate myeloid and those with band, segmented neutrophil, monocyte, and macrophage morphology as mature myeloid. Average percentages ± standard deviations from 3 independent experiments are shown. In week 6, the AES samples were not counted due to insufficient cells. The  $P$  value was obtained by comparing NUP98-HOXA9 with and without AES using a paired two-tailed t-test.

**Supplemental Table S2: AES counteracts the erythroid hyperplasia and shift to immaturity caused by NUP98-HOXA9**

|                   | Red     | White   | Mixed /Branched |
|-------------------|---------|---------|-----------------|
| Control           | 16 ± 6  | 84 ± 6  | 0               |
| AES               | 7 ± 4   | 91 ± 5  | 2 ± 2           |
| NUP98-HOXA9       | 36 ± 6  | 66 ± 11 | 5 ± 2           |
| NUP98-HOXA9 + AES | 12 ± 4* | 80 ± 7  | 8 ± 3           |

\*  $P=0.05$

Colonies from the CFC plates were counted under low magnification (40X). Red: Round erythroid colonies; White: Myeloid colonies; Mixed/Branched: Colonies with irregular contours with a mixed red/colorless and branched morphology. Average percentages ± standard deviations from 3 independent experiments are shown. The  $P$  value was obtained by comparing NUP98-HOXA9 with and without AES using a paired two-tailed t-test.

**Supplemental Table S3: Non-specific and AES-specific shRNA sequences**

| <b>Target</b> | <b>Company</b>     | <b>Catalog no.</b>     | <b>shRNA Sequence</b>         |
|---------------|--------------------|------------------------|-------------------------------|
| Non-Specific  | Origene            | TR30015                | GCACTACCAGAGCTAACTCAGATAGTACT |
| Human AES     | Origene            | TF306804 #<br>FI327209 | TACCACAGCCTCAAGCTCGAATGTGACAA |
| Human AES     | Origene            | TF306804 #<br>FI327211 | TCCTACGGCTTGAACATCGAGATGCACAA |
| Non-Specific  | Open<br>Biosystems | RHS4346                |                               |
| Human AES     | Open<br>Biosystems | RHS4430-<br>100992629  | ACGAATTCAGCTACTGCA            |
| Human AES     | Open<br>Biosystems | RHS4430-<br>99614203   | CTCAAGCTCGAATGTGACA           |
